# Supplementary material for: Women’s attitudes and beliefs towards specific contraceptive methods in Bangladesh and Kenya
Source: Springer Nature journal article supplement (doi:10.1186/s12978-018-0514-7), 2018-05-08
Supplement: MOESM1 [file 15746410]

## Additional files

**Table S1: Enrolment overview**

| Criteria                                               | Matlab | Nairobi | Homa Bay |
|--------------------------------------------------------|--------|---------|----------|
| Women identified in the database/household listing     | 3109   | 5905    | 3118     |
| Ineligible women identified at site                    | 121    | 589     | 235      |
| Out migration                                          | 188    | 1870    | 0        |
| Women not found at home after 3 visits                 | 181    | 132     | 198      |
| Temporarily away/household not located/had passed away | 7      | 363     | 0        |
| Refused                                                | 4      | 136     | 83       |
| Incapacitated                                          | 3      | 3       | 10       |
| Other*                                                 | 0      | 0       | 168      |
| Eligible women interviewed                             | 2605   | 2812    | 2424     |

\*167 women could not be interviewed due to resistance from the villagers and 1 woman was partially interviewed.

**Table S2: General attitudes by site**

|                                                      | Matlab (%) | Nairobi (%) | Homa-Bay (%) |
|------------------------------------------------------|------------|-------------|--------------|
| Respondent's attitudes to FP                         |            |             |              |
| Oppose                                               | 0.4        | 2.7         | 5.5          |
| Support                                              | 99.2       | 97.3        | 93.6         |
| Don't know/unsure                                    | 0.4        | 0.1         | 0.9          |
| Husband's attitudes to FP                            |            |             |              |
| Oppose                                               | 1.0        | 12.3        | 24.8         |
| Support                                              | 97.8       | 86.6        | 68.4         |
| Don't know/unsure                                    | 1.2        | 1.1         | 6.9          |
| Opposition to FP of friends, relatives or neighbours |            |             |              |
| Most                                                 | 1.1        | 6.3         | 14.4         |
| About half                                           | 0.5        | 2.5         | 5.8          |
| Few                                                  | 2.0        | 40.1        | 59.2         |
| None                                                 | 95.0       | 50.1        | 12.0         |
| Don't know/unsure                                    | 1.4        | 1.0         | 8.7          |
| FP use of friends, relatives or neighbours           |            |             |              |
| Most                                                 | 65.5       | 85.7        | 78.3         |
| About half                                           | 8.2        | 4.9         | 5.6          |
| Few                                                  | 21.6       | 6.4         | 11.3         |
| None                                                 | 2.2        | 2.3         | 0.3          |
| Don't know/unsure                                    | 2.6        | 0.7         | 4.5          |
| Religion                                             |            |             |              |
| Oppose                                               | 42.9       | 19.1        | 29.9         |
| Support                                              | 50.9       | 75.6        | 46.8         |
| No religion                                          | 1.9        | 1.3         | 0.2          |
| Don't know/unsure                                    | 4.3        | 4.0         | 23.1         |
| TOTAL (N)                                            | 2605       | 2812        | 2424         |

**Table S3: Percentage of respondents stating specific characteristics to be 'very important' by site**

|                                             | Matlab (%)  | Nairobi (%)  | Homa Bay (%) |
|---------------------------------------------|-------------|--------------|--------------|
| Effectiveness                               | 96.2        | 96.9         | 95.2         |
| No health risk                              | 80.7        | 94           | 92.8         |
| No effect on menstruation                   | 71.6        | 87.4         | 81.4         |
| No unpleasant side effects                  | 75          | 91           | 90.3         |
| Easy to use                                 | 83.5        | 90.1         | 88.4         |
| Clandestine use                             | 61.4        | 58.4         | 55           |
| Easy to obtain                              | 82.8        | 89.2         | 88.3         |
| Can be used for long time without re-supply | 67.3        | 64.5         | 83.3         |
| <b>TOTAL (N)</b>                            | <b>2605</b> | <b>2,812</b> | <b>2424</b>  |

**Table S4: Percentage of women with specific opinions (traditional methods) by site**

| Attributes                              | Matlab      |               | Nairobi      |               | Homa-Bay    |               |
|-----------------------------------------|-------------|---------------|--------------|---------------|-------------|---------------|
|                                         | Withdrawal  | Rhythm method | Withdrawal   | Rhythm method | Withdrawal  | Rhythm method |
| <b>Access</b>                           |             |               |              |               |             |               |
| Easy                                    | -           | -             | -            | -             | -           | -             |
| Hard                                    | -           | -             | -            | -             | -           | -             |
| Don't know/unsure                       | -           | -             | -            | -             | -           | -             |
| <b>Effectiveness</b>                    |             |               |              |               |             |               |
| Yes                                     | 78.8        | 73.8          | 26.8         | 46.0          | 37.8        | 47.4          |
| No                                      | 11.0        | 13.2          | 72.7         | 53.8          | 50.1        | 44.2          |
| Don't know                              | 10.2        | 13.0          | 0.5          | 0.2           | 12.1        | 8.4           |
| <b>Cause health problems</b>            |             |               |              |               |             |               |
| Yes, serious                            | 0.4         | 1.2           | 1.0          | 0.6           | 3.2         | 2.9           |
| Yes, not serious                        | 1.6         | 1.3           | 6.8          | 2.6           | 3.7         | 2.6           |
| No                                      | 59.8        | 60.6          | 91.7         | 96.8          | 83.2        | 88.0          |
| Don't know                              | 38.2        | 36.9          | 0.5          | 0.1           | 10.0        | 6.5           |
| <b>Interfere with menstruation</b>      |             |               |              |               |             |               |
| Yes                                     | -           | -             | -            | -             | -           | -             |
| No                                      | -           | -             | -            | -             | -           | -             |
| Don't know                              | -           | -             | -            | -             | -           | -             |
| <b>Cause unpleasant side effect</b>     |             |               |              |               |             |               |
| Yes                                     | 1.1         | 2.5           | 10.0         | 9.4           | 5.3         | 3.8           |
| No                                      | 58.6        | 58.6          | 89.9         | 90.5          | 84.4        | 89.2          |
| Don't know                              | 40.3        | 38.9          | 0.1          | 0.1           | 10.4        | 7.0           |
| <b>Unsafe to use for a long time</b>    |             |               |              |               |             |               |
| Yes, should take a break                | 21.4        | 17.9          | 59.0         | 37.0          | 44.2        | 35.9          |
| No, safe for long time                  | 48.4        | 52.2          | 36.0         | 61.9          | 44.6        | 57.7          |
| Don't know                              | 30.2        | 29.9          | 5.0          | 1.1           | 11.3        | 6.4           |
| <b>Cause infertility</b>                |             |               |              |               |             |               |
| Yes, perhaps                            | -           | -             | -            | -             | -           | -             |
| No                                      | -           | -             | -            | -             | -           | -             |
| Don't know                              | -           | -             | -            | -             | -           | -             |
| <b>FP use among friend, relatives</b>   |             |               |              |               |             |               |
| Most                                    | 1.3         | 0.3           | 1.7          | 4.1           | 1.9         | 6.0           |
| About half                              | 0.0         | 0.0           | 0.3          | 2.3           | 2.4         | 4.8           |
| Few                                     | 11.8        | 11.3          | 19.4         | 50.3          | 25.8        | 36.4          |
| None                                    | 7.9         | 8.9           | 73.2         | 42.1          | 21.3        | 21.3          |
| Don't know                              | 79.0        | 79.5          | 5.3          | 1.1           | 48.6        | 31.5          |
| <b>Experiences of friend, relatives</b> |             |               |              |               |             |               |
| Satisfactory                            | 9.0         | 8.5           | 10.7         | 33.6          | 10.0        | 23.5          |
| Unsatisfactory                          | 0.6         | 0.4           | 7.8          | 11.8          | 12.3        | 12.0          |
| Mixed                                   | 0.8         | 0.6           | 2.7          | 11.4          | 6.4         | 10.7          |
| No users known                          | 7.9         | 8.8           | 73.2         | 42.1          | 21.3        | 21.3          |
| Don't know                              | 81.7        | 81.6          | 5.5          | 1.1           | 50.1        | 32.5          |
| <b>Husband's approval</b>               |             |               |              |               |             |               |
| Approve                                 | 38.2        | 46.8          | 17.1         | 55.0          | 27.6        | 45.0          |
| Disapprove                              | 46.4        | 34.6          | 76.9         | 38.8          | 52.6        | 37.2          |
| Disapprove all methods                  | 0.2         | 0.4           | 5.6          | 5.7           | 8.0         | 7.9           |
| Don't know                              | 15.2        | 18.2          | 0.5          | 0.5           | 11.7        | 9.9           |
| <b>TOTAL(N)</b>                         | <b>1423</b> | <b>1853</b>   | <b>1,721</b> | <b>2,511</b>  | <b>1252</b> | <b>1724</b>   |

Note: Opinions about access, interference with menstruation, and causing infertility were not asked as they are not relevant for the traditional methods.
